# Supplementary material for: Isogenic pairs of induced-pluripotent stem-derived endothelial cells identify DYRK1A/PPARG/EGR1 pathway is responsible for Down syndrome-associated pulmonary hypertension
Source: PubMed Central journal article supplement — Hum Mol Genet. 2023 Oct 4;33(1):78–90. doi: 10.1093/hmg/ddad162 (PMC10729858; doi:10.1093/hmg/ddad162), 2023-10-04
Supplement: s3_2_ddad162.pdf [file s3_2_ddad162.pdf]

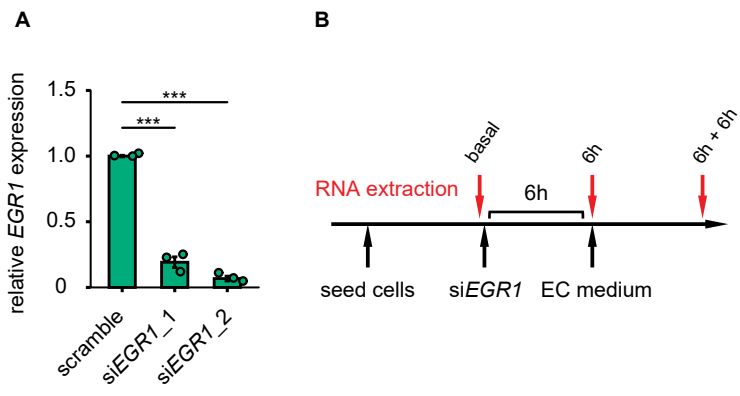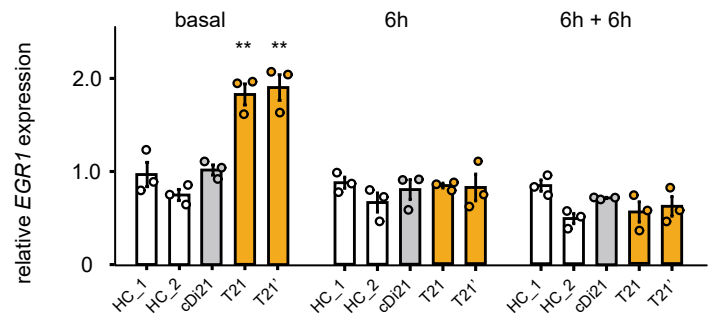

**Supplemental Figure 3. Suppression of *EGR1* expression by siRNA treatment.** (A) Relative mRNA expression of *EGR1* in T21-EC treated with two independent designs of siRNA and its scramble control. (B) Time course of *EGR1* expression after si*EGR1* treatment and retrieval. \*\*\* $P < 0.001$ , \*\* $P < 0.01$  as compared with scramble siRNA treated T21-ECs (A), and HC\_1, HC\_2, and cDi21 in basal static condition (B). Data are presented as mean  $\pm$  SEM. Data were analyzed by Tukey-Kramer test.
